# Supplementary material for: A step forward in gold–silver metallophilicity. An AuAg4moiety with a square pyramidal arrangement
Source: Royal Society of Chemistry journal article supplement (doi:10.1039/b502701m), 2005-01-01
Supplement: b502701m.pdf [file b502701m.pdf]

## **A Step Forward in Gold-Silver Metallophilicity. An AuAg<sub>4</sub> Moiety with a Square Pyramidal Arrangement.**

**Eduardo J. Fernández,<sup>\*a</sup> Antonio Laguna,<sup>\*b</sup> José M. López-de-Luzuriaga,<sup>a</sup> Miguel Monge,<sup>a</sup> Manuel Montiel,<sup>a</sup> Miguel Monge,<sup>a</sup> M. Elena Olmos,<sup>a</sup> Javier Pérez,<sup>a</sup> Raquel C. Puelles,<sup>a</sup> and Juan C. Sáenz<sup>a</sup>**

<sup>a</sup> *Departamento de Química, Universidad de La Rioja, Grupo de Síntesis Química de La Rioja, UA-CSIC. Complejo Científico-Tecnológico, 26004-Logroño, SPAIN. E-mail: eduardo.fernandez@dq.unirioja.es*

<sup>b</sup> *Departamento de Química Inorgánica, Instituto de Ciencia de Materiales de Aragón, Universidad de Zaragoza-CSIC, 50009-Zaragoza, SPAIN. Fax: +34 976 761187; Tel: +34 976 761185; E-mail: E-mail: alaguna@posta.unizar.es*

### **Electronic Supplementary Information**

#### **Experimental section.**

**NBu<sub>4</sub>[Au(3,5-C<sub>6</sub>F<sub>3</sub>Cl<sub>2</sub>)<sub>2</sub>] (1):** To a freshly prepared diethyl ether solution of Li(3,5-C<sub>6</sub>F<sub>3</sub>Cl<sub>2</sub>) (15 mmol) at -78°C and under an argon atmosphere was added [AuCl(tht)] (1.60 g, 5 mmol). After 30 min. of stirring NBu<sub>4</sub>Br (1.77 g, 5.5 mmol) was also added and the mixture was stirred overnight, allowing the temperature to increase slowly. A white precipitate was filtered off and washed with water, diethyl ether and *n*-hexane (3x10 mL). The resulting solid was solved in acetone and dried over anhydrous MgSO<sub>4</sub>. Evaporation of the solvent and addition of *n*-hexane afforded complex **1** as a white solid (3.14 g, 74.8 %). Mass spectrum (ES-) *m/z* = 597 ([Au(3,5-C<sub>6</sub>F<sub>3</sub>Cl<sub>2</sub>)<sub>2</sub>]<sup>+</sup>). Elemental

analysis (%) calcd. For  $C_{28}H_{36}AuF_6Cl_4N$ : C 40.07, H 4.32, N 1.67; Found: C 40.11, H 4.58, N 1.71.  $^{19}F$  NMR (282 MHz,  $CDCl_3$ ):  $\delta$  -89.14 (s, 4F,  $F_o$ ), -119.11 (s, 2F,  $F_p$ ). FT-IR (Nujol mulls):  $\nu = 882\text{ cm}^{-1}$  ( $NBu_4^+$ ),  $\nu = 1587, 1562, 1047, 775\text{ cm}^{-1}$  (3,5- $C_6F_3Cl_2$ ).  $\Lambda_M = 92\text{ ohm}^{-1}\text{cm}^2\text{mol}^{-1}$ .

**( $NBu_4$ )<sub>2</sub>[Au(3,5- $C_6F_3Cl_2$ )<sub>2</sub>Ag<sub>4</sub>( $\mu$ - $CF_3CO_2$ )<sub>5</sub>] (2):** To a solution of  $NBu_4CF_3CO_2$  (0.074 g, 0.2 mmol) and  $AgCF_3CO_2$  (0.177 g, 0.8 mmol) in dichloromethane was added complex **1** (0.168 g, 0.2 mmol) and the solution immediately turned yellow. After 30 min. of stirring the solution was concentrated in vacuum to ca. 5 mL and diethyl ether (20 mL) was added to precipitate complex **2** as a yellow solid (0.376 g, 90.4 %). Elemental analysis (%) calcd. For  $C_{54}H_{72}AuAg_4F_{21}Cl_4N_2O_{10}$ : C 31.20, H 3.50, N 1.35; Found: C 31.27, H 3.54, N 1.37.  $^{19}F$  NMR (282 MHz,  $CDCl_3$ ):  $\delta$  -72.96 (s, 15F,  $CF_3CO_2^-$ ),  $\delta$  -83.42 (s, 4F,  $F_o$ ), -109.50 (s, 2F,  $F_p$ ). FT-IR (Nujol mulls):  $\nu = 887\text{ cm}^{-1}$  ( $NBu_4^+$ ),  $\nu = 1588, 1557, 1057, 793\text{ cm}^{-1}$  (3,5- $C_6F_3Cl_2$ ),  $\nu = 1652, 1210\text{ cm}^{-1}$  ( $CF_3CO_2^-$ ).  $\Lambda_M = 208\text{ cm}^{-1}\text{cm}^2\text{mol}^{-1}$ .
